# Supplementary figures and images for: Effect of Lactobacillaceae Probiotics on Colonic Microbiota and Metabolite Production in Cystic Fibrosis: A Comparative In Vitro Study
Source: MDPI journal article supplement (doi:10.3390/nu15173846), 2023-09-03

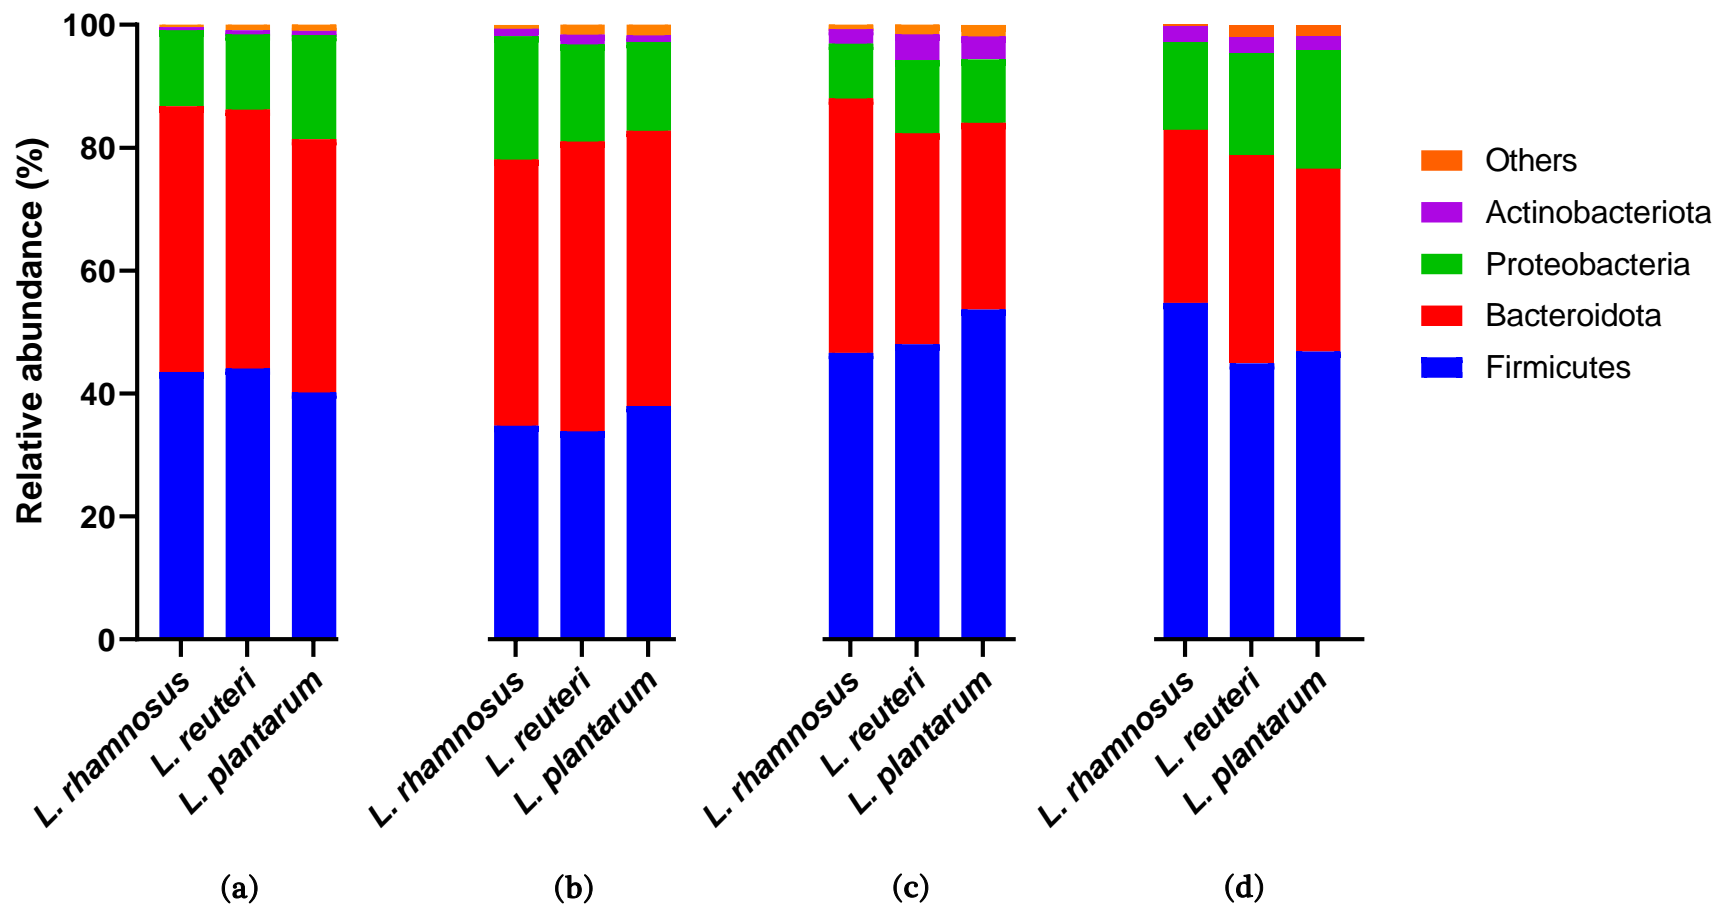

Supplement: s1 [file s1]
